# Supplementary material
Source: PubMed Central journal article supplement (PMC9334458)
Supplement: 40121_2022_667_MOESM1_ESM.pdf [file 40121_2022_667_MOESM1_ESM.pdf]

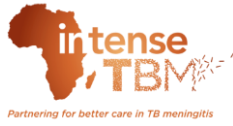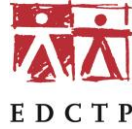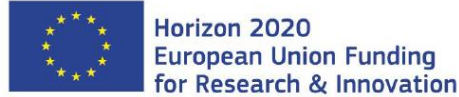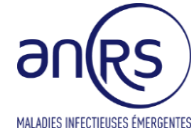

## Capacity Building in Sub-Saharan Africa as Part of the INTENSE-TBM Project During the COVID-19 Pandemic

Ariza-Vioque E.<sup>1</sup>, Elio F.<sup>2</sup>, Andriamamonjisoa H.<sup>3</sup>, Machault V.<sup>4</sup>, González-Martín J.<sup>5,6,7</sup>, Calvo-Cortés M.C.<sup>8</sup>, Eholié S.<sup>9</sup>, Tchabert G.A.<sup>2</sup>, Ouassa T.<sup>10</sup>, Raberahona M.<sup>11,12,13</sup>, Rakotoarivelo R.<sup>14,15</sup>, Razafindrakoto H.<sup>11</sup>, Rahajamanana L.<sup>11</sup>, Wilkinson R.J.<sup>16,17,18</sup>, Davis A.<sup>16</sup>, Maxebengula M.<sup>16</sup>, Abrahams F.<sup>16</sup>, Muzoora C.<sup>19,20</sup>, Nakigozi N.<sup>19</sup>, Nyehangane D.<sup>19</sup>, Nanjebe D.<sup>19</sup>, Mbega H.<sup>19</sup>, Kaitano R.<sup>19</sup>, Bonnet M.<sup>21,22</sup>, Debeaudrap P.<sup>22</sup>, Miró J.M.<sup>1,7,23,24</sup>, Anglaret X.<sup>2,4</sup>, Rakotosamimanana N.<sup>3</sup>, Calmy A.<sup>25\*</sup>, Bonnet F.<sup>4,26\*</sup>, Ambrosioni J.<sup>1,7,23,24\*</sup>, and the INTENSE-TBM group.

<sup>1</sup>Institut d'Investigacions Biomèdiques August Pi i Sunyer (IDIBAPS), Barcelona, Spain;

<sup>2</sup>Programme ANRS Coopération Côte d'Ivoire (PAC-CI), Abidjan, Ivory Coast;

<sup>3</sup>Institut Pasteur de Madagascar, Antananarivo, Madagascar;

<sup>4</sup>INSERM U1219, Bordeaux Population Health (BPH), Université de Bordeaux, Bordeaux, France;

<sup>5</sup>Servei de Microbiologia, Centre de Diagnòstic Biomèdic (CDB), Hospital Clínic de Barcelona, Barcelona, Spain;

<sup>6</sup>Institut de Salut Global (ISGlobal), Barcelona, Spain;

<sup>7</sup>Facultat de Medicina i Ciències de la Salut, Universitat de Barcelona, Barcelona, Spain;

<sup>8</sup>Agence Nationale de Recherche sur le SIDA et les Hépatites Virales (ANRS), Maladies Infectieuses Émergentes, Paris, France;

<sup>9</sup>Centre Hospitalier Universitaire (CHU) Treichville, Abidjan, Ivory Coast;

<sup>10</sup>Centre de Diagnostic et de Recherche sur le SIDA et les autres maladies infectieuses (CeDRoS), Abidjan, Ivory Coast;

<sup>11</sup>Centre d'Infectiologie Charles Mérieux (CICM), Antananarivo, Madagascar;

<sup>12</sup>Université d'Antananarivo, Antananarivo, Madagascar;

<sup>13</sup>Centre Hospitalier Universitaire (CHU) Joseph Raseta Befalatanana, Antananarivo, Madagascar;

<sup>14</sup>Université de Fianarantsoa, Fianarantsoa, Madagascar;

<sup>15</sup>Centre Hospitalier Universitaire (CHU) Tambohobe, Fianarantsoa, Madagascar;

<sup>16</sup>Wellcome Centre for Infectious Diseases Research in Africa, Republic of South Africa;

<sup>17</sup>Francis Crick Institute, London, UK;

<sup>18</sup>Department Infectious Diseases, Imperial College London, UK;

<sup>19</sup>Médecins Sans Frontières (MSF) Epicentre, Mbarara, Uganda;

<sup>20</sup>Mbarara University of Science and Technology (MUST), Mbarara, Uganda;

<sup>21</sup>Université de Montpellier, Montpellier, France;

<sup>22</sup>Recherches Translationnelles sur le VIH et les Maladies Infectieuses (TransVIHMI), Institut de Recherche pour le Développement (IRD), INSERM, France;

<sup>23</sup>HIV Unit, Infectious Diseases Service, Hospital Clínic de Barcelona, Barcelona, Spain;

<sup>24</sup>Centro de Investigación Biomédica en Red de Enfermedades Infecciosas (CIBERINFEC), Madrid, Spain;

<sup>25</sup>Université de Genève (UNIGE), Geneva, Switzerland;

<sup>26</sup>Service de Médecine Interne et Maladies Infectieuses, Saint-André Hospital, Centre Hospitalier Universitaire (CHU) de Bordeaux, Bordeaux, France.

\*These last authors contributed equally to this work.

Running title: Capacity building in sub-Saharan Africa

Corresponding author: [jambrosioni@intramed.net](mailto:jambrosioni@intramed.net) (JA), HIV Unit, Infectious Diseases Service, Hospital Clínic, Villarroel 170, 08036 Barcelona, Spain.

## List of Investigators and Study Team Members - ANRS 12398

Names are in alphabetical order

### Trial coordination

#### France

- **Inserm Unité 1219, Université of Bordeaux** : Xavier Anglaret, Fabrice Bonnet, Corine Chazallon, Sophie Karcher, Jérôme Le Carrou, Vanessa Machault

#### Ivory Coast

- **Programme PAC-CI** : Mamoudou Diabaté, Frédéric Ello, Romuald Konan, Séverin Lenaud, Serge Niangoran, Brice Martial Yapi, Cyrille Yapi

### Sponsor

#### France

- **ANRS / MIE** : Joséphine Balssa, Célia Bouharati, Maria-Camila Calvo-Cortés, Alpha Diallo, Isabelle Fournier, Ventzislava Petrov-Sanchez

#### Ivory Coast

#### Country coordination

- **Programme PAC-CI** : Serge Paul Eholié, Annick Guié Tchabert, Patrick Kouabenan

#### Clinical sites

- **Service des Maladies Infectieuses et Tropicales (SMIT), CHU de Treichville, Abidjan** : Lehi Salimata Monka Coulibaly Fanny, Jacqueline Dano, Kadidja Diarra, Serge Paul Eholié, Robert Ninkan Gbey, Daouda Keita, N'goran Edwige Kouadio, Gisèle Affoué Kouakou, Aya Florence Kouakou, Ferdinand Kouamé, Wardatou Dine Mourtada, Maimouna Yaro, Valentin Yavo, Odette Blédou Zougrou

- **Centre Hospitalier Universitaire de Angré, Abidjan** : Yves Binan

- **Centre Hospitalier Universitaire de Cocody, Abidjan** : Horo Kigninlman

#### Biology

- **Centre de Diagnostic et de Recherches sur le SIDA (CeDReS), CHU de Treichville, Abidjan** : Zacharie Abodou, Roseline Affi, Hugues Ahiboh, Cyrielle Aka, Agathe Dotia, André Inwoley, Taïratou Kamagaté, Fulgence Kassi, Hermance Kassi, Alimatou Kéita Marcial Koffi, Estelle Koné, Fatoumata Koné, Hervé Menan, Marcelle N'guessan, Dominique Oloye, Timothée Ouassa, Vincent Yapo, Karna Yéo, Sigata Yéo, Jaurès Zambélé

### Uganda

#### Country coordination

- **Epicentre Mbarara Research Centre**: Moreen Kambabazi, Jane Nabutto, Noor Nakigozi, Conrad Muzoora

#### Clinical sites

- **Mbarara Regional Referral Hospital, Mabarara**: Shamilah Kaggwa, Ivan Kalule, Gaudioza Mugabiirwe, Conrad Muzoora, Noor Nakigozi, Hamidah Nakyenzi, Abia Twongire, Felix Yetungye

- **Regional Reference Hospital of Kabale, Kabale**: Alexander Ahimbisibwe, Andrew Mbonye, Anne Marion Namutebi, Brian Turigye

#### Biology

- **Epicentre Mbarara Research Centre**: Gilbert Akankwasa, Rodney Kaitano, Hassani Mbega, Deborah Nanjebe K, Dan Nyehanange

## Madagascar

### Country coordination

- **Centre d'Infectiologie Charles Mérieux (CICM), Université d'Antananarivo** : Mihaja Raberahona, Rivo Rakatoarivelo, Haingo Razafindrakoto

### Clinical sites

- **University Hospital Joseph Raseta, Antananarivo** : Mamy Jean de Dieu Randria, Mihaja Raberahona, Hobimahanina Rajaonarison, Rado Rakotomalala  
- **University Hospital Tambohobe, Fianarantsoa**: Natacha Mamilaza, Rivo Rakatoarivelo

### Biology

- **Centre d'Infectiologie Charles Mérieux (CICM), Université d'Antananarivo** : Dera Andriantahiana, Tahinamandranto Rasamoelina, Vonintsoa Lalaina Rahajamanana  
- **Institut Pasteur de Madagascar (IPM), Antananarivo** : Fanomezantsoa Rajasinelina, Niaina Rakotosamimanana

## South Africa

### Country coordination

- **Wellcome Centre for Infectious Diseases Research in Africa, University of Cape Town (UCT), Faculty of Health Science**: Fatima Abrahams, Angharad Davis, Amanda Jackson, Rene Tina Goliath, Nompumelo Maxebengula, Graeme Meintjes, Cari Stek, Sean Wasserman, Robert J Wilkinson

### Clinical sites

- **Khayelitsha District Hospital, Cape Town**: Trevor Mnguni, Melisha Panchoo  
- **Mitchells Plain Hospital, Cape Town**: Tom Crede, Jonathan Naude, Melisha Panchoo, Patryk Szymanski  
- **New Somerset Hospital, Cape Town**: Yakooob Vallie, Mohammed Shiraz Moosa, Hsin-Chi Huang, Melisha Panchoo  
- **Livingstone and PE Central Hospitals, Port Elizabeth**: John Black, Yakub Kadernani, Galit Seligmann  
- **Dora Nginza Hospital, Port Elizabeth**: Nowshad Alam, Yakub Kadernani, Lokathula Maphalala, Galit Seligmann

### Biology

- **Wellcome Centre for Infectious Diseases Research in Africa, University of Cape Town (UCT), Faculty of Health Science**: Angharad Davis, Rachel P-J Lai, Graeme Meintjes, Keira Skolimowska, Sean Wasserman, Robert J Wilkinson

## Spain

- **IDIBAPS / Hospital Clínic de Barcelona, Servicio de Enfermedades Infecciosas, Barcelona** : Juan Ambrosioni, Eva Ariza-Vioque, Carla Bastida, Mercè Brunet, Julià González-Martín, Josep Mallolas, José María Miró, Edgar Martín, José Antonio Martínez-Martínez, Margalida Mestre, Griselda Tudó, Montse Tuset.

## Switzerland

- **University of Geneva / Geneva University Hospitals** : Alexandra Calmy, Thomas Maître, Pilar Ustero Alonso, Patricia Vazquez

## France

- **Institut de Recherche pour le Développement (IRD)** : Pierre Debeaudrap  
- **University of Montpellier / IRD / INSERM (TransVIHMI)** : Maryline Bonnet  
- **Médecins sans Frontières / EPICENTRE / IRD** : Gino Agbota
